# Supplementary material
Source: PubMed Central journal article supplement (PMC4154585)
Supplement: NIHMS609045-supplement-Supplement.pdf [file NIHMS609045-supplement-Supplement.pdf]

**Supplemental Data Table 1.** Linear correlation analysis, by sex, between biological variables and total GGT activity.

| <b>Variables</b>                     | <b>Men</b>         | <b>Women</b>       |
|--------------------------------------|--------------------|--------------------|
| <b>Age</b>                           | -0.05              | 0.09 <sup>†</sup>  |
| <b>BMI</b>                           | 0.13 <sup>‡</sup>  | 0.21 <sup>‡</sup>  |
| <b>Waist circumference</b>           | 0.15 <sup>‡</sup>  | 0.25 <sup>‡</sup>  |
| <b>Alcohol</b>                       | 0.26 <sup>‡</sup>  | 0.09 <sup>†</sup>  |
| <b>Coffee</b>                        | -0.04              | -0.03              |
| <b>Physical activity</b>             | -0.06              | -0.04              |
| <b>Heart rate</b>                    | 0.18 <sup>‡</sup>  | 0.19 <sup>‡</sup>  |
| <b>SBP</b>                           | 0.09 <sup>†</sup>  | 0.16 <sup>‡</sup>  |
| <b>DBP</b>                           | 0.14 <sup>‡</sup>  | 0.11 <sup>‡</sup>  |
| <b>Creatinine<sup>#</sup></b>        | -0.09 <sup>†</sup> | -0.06 <sup>§</sup> |
| <b>Blood glucose</b>                 | 0.12 <sup>‡</sup>  | 0.24 <sup>‡</sup>  |
| <b>Total cholesterol</b>             | 0.23 <sup>‡</sup>  | 0.21 <sup>‡</sup>  |
| <b>HDL Cholesterol</b>               | 0.03               | -0.13 <sup>‡</sup> |
| <b>LDL cholesterol</b>               | 0.02               | 0.16 <sup>‡</sup>  |
| <b>Triglycerides<sup>#</sup></b>     | 0.28 <sup>‡</sup>  | 0.30 <sup>‡</sup>  |
| <b>CRP<sup>#</sup></b>               | 0.16 <sup>‡</sup>  | 0.24 <sup>‡</sup>  |
| <b>Fibrinogen<sup>#</sup></b>        | -0.02              | 0.08 <sup>§</sup>  |
| <b>PAI-1<sup>#</sup></b>             | 0.34 <sup>‡</sup>  | 0.41 <sup>‡</sup>  |
| <b>HCys<sup>#</sup></b>              | 0.02               | 0.10 <sup>‡</sup>  |
| <b>UACR,<sup>#</sup></b>             | 0.04               | 0.05               |
| <b>BNP<sup>#</sup></b>               | -0.06              | -0.06              |
| <b>Aldosterone<sup>#</sup></b>       | 0.08 <sup>§</sup>  | 0.10 <sup>‡</sup>  |
| <b>Renin<sup>#</sup></b>             | 0.05               | 0.11 <sup>‡</sup>  |
| <b>Aldosterone/Renin<sup>#</sup></b> | -0.01              | -0.05              |
| <b>D-dimer<sup>#</sup></b>           | -0.05              | 0.08 <sup>§</sup>  |

Data are reported as Pearson correlation coefficients. BMI: body mass index; BNP: brain natriuretic peptide; CRP: C-reactive protein; DBP: diastolic blood pressure; HCys: homocysteine; PAI-1: plasminogen activator inhibitor 1; Q: quartile; SBP: systolic blood pressure; UACR: urine-albumin to creatinine ratio. #Linear correlation analysis have been performed on ln-transformed data, also fractional GGT data were ln-transformed. Statistical significance level: §P < 0.01; †P < 0.001; ‡P < 0.0001; otherwise P ≥ 0.01.

**Supplemental Data Table 2.** Clinical correlates of total GGT, by sex, as determined by multivariable linear regression analysis.

| Variable                   | Total GGT              |        |       |
|----------------------------|------------------------|--------|-------|
|                            | Regression coefficient | 95% CI |       |
| <b>MEN (n=1422)</b>        |                        |        |       |
| Age                        | -0.05                  | -0.10  | -0.01 |
| Waist Circumference        |                        |        |       |
| Alcohol                    | 0.16 <sup>‡</sup>      | 0.11   | 0.21  |
| Heart rate                 | 0.08 <sup>†</sup>      | 0.04   | 0.13  |
| SBP                        |                        |        |       |
| Blood glucose              | 0.03                   | -0.01  | 0.08  |
| HDL Cholesterol            | 0.17 <sup>‡</sup>      | 0.12   | 0.23  |
| LDL cholesterol            | 0.00                   | -0.05  | 0.05  |
| Triglycerides <sup>#</sup> | 0.25 <sup>‡</sup>      | 0.19   | 0.31  |
| CRP <sup>#</sup>           | 0.16 <sup>‡</sup>      | 0.10   | 0.22  |
| Fibrinogen, <sup>#</sup>   | -0.11 <sup>†</sup>     | -0.17  | -0.06 |
| PAI-1 <sup>#</sup>         | 0.21 <sup>‡</sup>      | 0.15   | 0.26  |
| HCys <sup>#</sup>          | 0.01                   | -0.04  | 0.06  |
| <b>WOMEN (n=1616)</b>      |                        |        |       |
| Age                        | -0.02                  | -0.07  | 0.03  |
| Waist circumference        |                        |        |       |
| Alcohol                    | 0.08 <sup>§</sup>      | 0.03   | 0.12  |
| Heart rate                 | 0.04                   | -0.01  | 0.09  |
| SBP                        |                        |        |       |
| Blood glucose              | 0.07 <sup>§</sup>      | 0.02   | 0.12  |
| HDL Cholesterol            | 0.05                   | -0.01  | 0.10  |
| LDL cholesterol            | 0.08 <sup>†</sup>      | 0.04   | 0.13  |
| Triglycerides <sup>#</sup> | 0.15 <sup>‡</sup>      | 0.09   | 0.20  |
| CRP <sup>#</sup>           | 0.10 <sup>†</sup>      | 0.05   | 0.16  |
| Fibrinogen, <sup>#</sup>   | -0.08 <sup>§</sup>     | -0.14  | -0.03 |
| PAI-1 <sup>#</sup>         | 0.29 <sup>‡</sup>      | 0.24   | 0.35  |
| HCys <sup>#</sup>          | 0.06                   | 0.01   | 0.10  |

Standardized regression coefficients (95% CI) for significant correlations are shown. CRP: C-reactive protein; DBP: diastolic blood pressure; PAI-1: plasminogen activator inhibitor 1. #Linear correlation analysis have been performed on ln-transformed data, also fractional GGT data were ln-transformed. Statistical significance level: §P < 0.01; †P < 0.001; ‡P < 0.0001; otherwise P ≥ 0.01.

**Supplemental Data Table 3.** Clinical baseline characteristics of the Reference Group (n =432).

|                                            | <b>Men</b>         | <b>Women</b>                    |
|--------------------------------------------|--------------------|---------------------------------|
| <b>n (%)</b>                               | 194 (45)           | 238 (55)                        |
| <b>Age, years</b>                          | 56 (10)            | 58 (10)                         |
| <b>BMI, Kg/m<sup>2</sup></b>               | 26.2 (2.3)         | 24.8 (2.7)                      |
| <b>Waist circumference, cm</b>             | 96 (7)             | 89 (10)                         |
| <b>Alcohol, drink/week</b>                 | 4.5 (4.7)          | 1.7 (2.2)                       |
| <b>Coffee consumption, cups/day</b>        | 2.0 (2.2)          | 1.5 (1.6)                       |
| <b>Physical activity index, times/week</b> | 3.1 (2.2)          | 2.2 (2.3)                       |
| <b>Heart rate, bpm</b>                     | 61 (10)            | 65 (8)                          |
| <b>SBP, mmHg</b>                           | 121 (10)           | 120 (13)                        |
| <b>DPB, mmHg</b>                           | 75 (7)             | 72 (8)                          |
| <b>Pre-diabetes, n (%)</b>                 | 85 (44)            | 51 (21)                         |
| <b>Blood glucose, mg/dL</b>                | 98 (91 – 104)      | 92 (87 – 99)                    |
| <b>Creatinine, mg/dL</b>                   | 1.2 (1.2 – 1.3)    | 1.0 (1.0 – 1.2)                 |
| <b>UACR, mg/g</b>                          | 3.8 (1.7 – 6.6)    | 8.2 (3.7 – 15.3)                |
| <b>Total cholesterol, mg/dL</b>            | 196 (172 – 221)    | 210 (184 – 241)                 |
| <b>HDL Cholesterol, mg/dL</b>              | 41 (35 – 51)       | 54 (47 – 65)                    |
| <b>LDL Cholesterol, mg/dL</b>              | 128 (105 – 151)    | 130 (109 – 151)                 |
| <b>Triglycerides, mg/dL</b>                | 112 (77 – 149)     | 110 (77 – 164)                  |
| <b>CRP, mg/dL</b>                          | 1.2 (0.6 – 2.6)    | 1.5 (0.7 – 3.4)                 |
| <b>Fibrinogen, mg/dL</b>                   | 303 (272 – 351)    | 316 (288 – 358)                 |
| <b>PAI-1, ng/ml</b>                        | 20.9 (14.0 – 28.0) | 17.6 (9.9 – 25.6)               |
| <b>HCys, μmol/L</b>                        | 9.6 (8.3 – 11.2)   | 7.6 (6.2 – 9.2)                 |
| <b>BNP, ng/L</b>                           | 4.2 (4.0 – 10.5)   | 9.2 (4.0 – 17.7)                |
| <b>Aldosterone, ng/dL</b>                  | 9.0 (7.0 – 13)     | 10.0 (7.0 – 14.0)               |
| <b>Renin, mUI/L</b>                        | 14.0 (10.0 – 21.5) | 9.0 (6.0 – 15.0)                |
| <b>Aldosterone/Renin</b>                   | 0.6 (0.4 – 0.9)    | 1.0 (0.6 – 1.7)                 |
| <b>D-dimer μg/mL</b>                       | 235 (132 – 362)    | 299 (191 – 418)                 |
| <b>Total GGT, U/L</b>                      | 23.1 (16.7 – 35.2) | 16.8 (13.0 – 23.8) <sup>‡</sup> |
| <b>b-GGT, U/L</b>                          | 3.1 (2.1 – 6.1)    | 2.5 (1.7 – 4.3) <sup>§</sup>    |
| <b>m-GGT, U/L</b>                          | 0.5 (0.3 – 0.9)    | 0.3 (0.2 – 0.6) <sup>†</sup>    |
| <b>s-GGT, U/L</b>                          | 6.3 (4.0 – 12.7)   | 4.1 (2.7 – 7.8) <sup>‡</sup>    |
| <b>f-GGT, U/L</b>                          | 11.7 (9.8 – 14.9)  | 9.4 (7.7 – 11.3) <sup>‡</sup>   |
| <b>b-GGT/s-GGT</b>                         | 0.46 (0.33 – 0.68) | 0.59 (0.38 – 0.85) <sup>†</sup> |

Data are presented as mean (SD) or median (Q1-Q3), unless otherwise indicated. BMI: body mass index; BNP: brain natriuretic peptide; CRP: C-reactive protein; DBP: diastolic blood pressure; HCys: homocysteine; PAI-1: plasminogen activator inhibitor 1; Q: quartile; SBP: systolic blood pressure; UACR: urine-albumin to creatinine ratio. Wilcoxon-Mann-Whitney test, statistical significance level: <sup>§</sup>P < 0.01; <sup>†</sup>P < 0.001; <sup>‡</sup>P < 0.0001.
